# Supplementary material
Source: PubMed Central journal article supplement (PMC4908837)
Supplement: NIHMS778480-supplement-Table_S1.pdf [file NIHMS778480-supplement-Table_S1.pdf]

Table S1: Comparison of MetaSparse*K*means clustering and PAM50 clustering results on METABRIC dataset. Columns: 5 clusters defined by MetaSparse*K*means. Rows: 5 clusters defined by PAM50.

|        | 1   | 2   | 3   | 4   | 5   |
|--------|-----|-----|-----|-----|-----|
| Basal  | 8   | 122 | 8   | 10  | 180 |
| Her2   | 9   | 95  | 67  | 60  | 7   |
| LumA   | 354 | 1   | 34  | 330 | 0   |
| LumB   | 16  | 3   | 261 | 205 | 5   |
| Normal | 122 | 11  | 10  | 57  | 0   |
